# Supplementary material
Source: publisher figshare collection journal article supplement (https://acs.figshare.com/ndownloader/files/4608865)
Supplement: Supplementary file 1 [file 4608865]

### S-1. Derivation of Lemma 1

For a polypeptide  $C_{n_C}H_{n_H}N_{n_N}O_{n_O}S_{n_S}$ , we can compute  $I_k$  by the coefficient of  $x^k$  in the expansion of the following polynomial<sup>1, 2, 3</sup>.

$$P(x) = (P_{C_0} + P_{C_1}x)^{n_C} (P_{H_0} + P_{H_1}x)^{n_H} (P_{N_0} + P_{N_1}x)^{n_N} (P_{O_0} + P_{O_1}x + P_{O_2}x^2)^{n_O} (P_{S_0} + P_{S_1}x + P_{S_2}x^2 + P_{S_4}x^4)^{n_S} \quad (1)$$

That is, intensity  $I_k$  in an isotopic distribution of a polypeptide is regarded as the sum of existential probabilities of all polypeptide instances with mass difference  $k$ . Intensity  $I_0$  is the probability of there being no isotopes in  $C_{n_C}H_{n_H}N_{n_N}O_{n_O}S_{n_S}$ , which is the constant term of polynomial  $P(x)$ , defined as follows.

$$I_0 = P_{C_0}^{n_C} P_{H_0}^{n_H} P_{N_0}^{n_N} P_{O_0}^{n_O} P_{S_0}^{n_S} \quad (2)$$

Intensity  $I_1$  is the probability of there being only one +1 isotope, which is the coefficient of  $x$  in  $P(x)$ , and  $I_2$  is the probability of there being two +1 isotopes or one +2 isotope, which is the coefficient of  $x^2$ , and they are defined as follows.

$$\begin{aligned} I_1 &= n_C P_{C_0}^{n_C-1} P_{C_1} P_{H_0}^{n_H} P_{N_0}^{n_N} P_{O_0}^{n_O} P_{S_0}^{n_S} + n_H P_{C_0}^{n_C} P_{H_0}^{n_H-1} P_{H_1} P_{N_0}^{n_N} P_{O_0}^{n_O} P_{S_0}^{n_S} + \dots \\ &= I_0 \sum_{X \in A} n_X \frac{P_{X_1}}{P_{X_0}} \end{aligned} \quad (3)$$

$$\begin{aligned}
I_2 = & \binom{n_C}{2} P_{C_0}^{n_C-2} P_{C_1}^2 P_{H_0}^{n_H} P_{N_0}^{n_N} P_{O_0}^{n_O} P_{S_0}^{n_S} + \binom{n_H}{2} P_{C_0}^{n_C} P_{H_0}^{n_H-2} P_{H_1}^2 P_{N_0}^{n_N} P_{O_0}^{n_O} P_{S_0}^{n_S} \\
& + \dots + \binom{n_S}{2} P_{C_0}^{n_C} P_{H_0}^{n_H} P_{N_0}^{n_N} P_{O_0}^{n_O} P_{S_0}^{n_S-2} P_{S_1}^2 \\
& + n_C n_H P_{C_0}^{n_C-1} P_{C_1} P_{H_0}^{n_H-1} P_{H_1} P_{N_0}^{n_N} P_{O_0}^{n_O} P_{S_0}^{n_S} \\
& + n_C n_N P_{C_0}^{n_C-1} P_{C_1} P_{H_0}^{n_H} P_{N_0}^{n_N-1} P_{N_1} P_{O_0}^{n_O} P_{S_0}^{n_S} \\
& + \dots \\
& + n_O P_{C_0}^{n_C} P_{H_0}^{n_H} P_{N_0}^{n_N} P_{O_0}^{n_O-1} P_{O_2} P_{S_0}^{n_S} + n_S P_{C_0}^{n_C} P_{H_0}^{n_H} P_{N_0}^{n_N} P_{O_0}^{n_O} P_{S_0}^{n_S-1} P_{S_2} \\
= & I_0 \left( \sum_{X \in A} \binom{n_X}{2} \frac{P_{X_1}^2}{P_{X_0}^2} + \sum_{\substack{X, Y \in A \\ X \neq Y}} n_X n_Y \frac{P_{X_1} P_{Y_1}}{P_{X_0} P_{Y_0}} + \sum_{X \in A} n_X \frac{P_{X_2}}{P_{X_0}} \right)
\end{aligned} \tag{4}$$

Now consider intensity  $I_k$  for an arbitrary  $k \geq 1$ . The instances with a mass difference  $k = k_1 + 2k_2 + 4k_4$  consist of all the instances with  $k_1$  isotopes of +1Da,  $k_2$  isotopes of +2Da, and  $k_4$  isotopes of +4Da. For a polypeptide instance, let  $t_{X_1}$ ,  $t_{X_2}$ , and  $t_{X_4}$  be the number of +1, +2, and +4 isotopes of atom  $X$ , respectively. Then, the probability of all instances with given  $k_1$ ,  $k_2$ , and  $k_4$  is the sum of the probabilities of there being  $t_{X_1}$ ,  $t_{X_2}$ , and  $t_{X_4}$  isotopes for each atom  $X$  such that the sum of  $t_{X_1}$  for all atoms  $X$  is  $k_1$ , that of  $t_{X_2}$  is  $k_2$ , and that of  $t_{X_4}$  is  $k_4$ .  $I_k$  is the probability sum of all combinations of  $k_1$ ,  $k_2$ , and  $k_4$  such that  $k = k_1 + 2k_2 + 4k_4$  as follows.

$$\begin{aligned}
I_k = & \sum_{k_1+2k_2+4k_4=k} \sum_{t_{C_1}+t_{H_1}+\dots+t_{S_1}=k_1} \sum_{t_{C_2}+t_{H_2}+\dots+t_{S_2}=k_2} \sum_{t_{C_4}+t_{H_4}+\dots+t_{S_4}=k_4} \\
& \prod_X \binom{n_X}{t_{X_1} \quad t_{X_2} \quad t_{X_4}} P_{X_1}^{t_{X_1}} P_{X_2}^{t_{X_2}} P_{X_4}^{t_{X_4}} P_{X_0}^{n_X-t_{X_1}-t_{X_2}-t_{X_4}}
\end{aligned} \tag{5}$$

Since  $n_X$  (number of atom  $X$ ) is much larger than  $t_{X_1}$ ,  $t_{X_2}$ , and  $t_{X_4}$  in practice, we

employ the following approximation.

$$\binom{n_X}{t_{X_1} \quad t_{X_2} \quad t_{X_4}} = \frac{n_X!}{(n_X - t_{X_1} - t_{X_2} - t_{X_4})! t_{X_1}! t_{X_2}! t_{X_4}!} \approx \frac{n_X^{t_{X_1} + t_{X_2} + t_{X_4}}}{t_{X_1}! t_{X_2}! t_{X_4}!} \quad (6)$$

Then, we obtain the approximation of  $I_k$  in Lemma 1 by algebraic manipulations.

$$\begin{aligned} I_k &\approx \sum_{k_1+2k_2+4k_4=k} \sum_{t_{X_1}} \sum_{t_{X_2}} \sum_{t_{X_4}} \prod_X \frac{n_X^{t_{X_1} + t_{X_2} + t_{X_4}}}{t_{X_1}! t_{X_2}! t_{X_4}!} P_{X_1}^{t_{X_1}} P_{X_2}^{t_{X_2}} P_{X_4}^{t_{X_4}} P_{X_0}^{n_X - t_{X_1} - t_{X_2} - t_{X_4}} \\ &= \sum_{k_1+2k_2+4k_4=k} \sum_{t_{X_1}} \sum_{t_{X_2}} \sum_{t_{X_4}} \prod_X P_{X_0}^{n_X} \frac{1}{t_{X_1}!} \left( \frac{n_X P_{X_1}}{P_{X_0}} \right)^{t_{X_1}} \frac{1}{t_{X_2}!} \left( \frac{n_X P_{X_2}}{P_{X_0}} \right)^{t_{X_2}} \frac{1}{t_{X_4}!} \left( \frac{n_X P_{X_4}}{P_{X_0}} \right)^{t_{X_4}} \\ &= \sum_{k_1+2k_2+4k_4=k} \prod_X P_{X_0}^{n_X} \left( \sum_{t_{X_1}} \prod_X \frac{1}{t_{X_1}!} \left( \frac{n_X P_{X_1}}{P_{X_0}} \right)^{t_{X_1}} \right) \left( \sum_{t_{X_2}} \prod_X \frac{1}{t_{X_2}!} \left( \frac{n_X P_{X_2}}{P_{X_0}} \right)^{t_{X_2}} \right) \left( \sum_{t_{X_4}} \prod_X \frac{1}{t_{X_4}!} \left( \frac{n_X P_{X_4}}{P_{X_0}} \right)^{t_{X_4}} \right) \\ &= \sum_{k_1+2k_2+4k_4=k} \frac{\prod_X P_{X_0}^{n_X}}{k_1! k_2! k_4!} \left( \sum_{t_{X_1}} k_1! \prod_X \frac{1}{t_{X_1}!} \left( \frac{n_X P_{X_1}}{P_{X_0}} \right)^{t_{X_1}} \right) \left( \sum_{t_{X_2}} k_2! \prod_X \frac{1}{t_{X_2}!} \left( \frac{n_X P_{X_2}}{P_{X_0}} \right)^{t_{X_2}} \right) \left( \sum_{t_{X_4}} k_4! \prod_X \frac{1}{t_{X_4}!} \left( \frac{n_X P_{X_4}}{P_{X_0}} \right)^{t_{X_4}} \right) \\ &= \sum_{k_1+2k_2+4k_4=k} \frac{I_0}{k_1! k_2! k_4!} \left( \sum_X \frac{n_X P_{X_1}}{P_{X_0}} \right)^{k_1} \left( \sum_X \frac{n_X P_{X_2}}{P_{X_0}} \right)^{k_2} \left( \sum_X \frac{n_X P_{X_4}}{P_{X_0}} \right)^{k_4} \quad (7) \end{aligned}$$

## S-2. Methods for Improving Accuracy

Some more techniques were implemented to improve the accuracy of our method. We apply different techniques according to the mass, because the number of peaks of a pseudo cluster becomes larger as the mass increases.

When a peptide mass is less than 4000 Da, all the peaks of a pseudo cluster are considered important because there are only a few peaks in the cluster. In such cases, the number of terms summed in score calculation is also small and the effect of missing peaks (often excluded during the peak picking step) on the score can be significant. To overcome such difficulties, we additionally select some of the missing peaks from the raw spectrum. Assume that  $p$  peaks ( $p \geq 1$ ) are missing in a pseudo cluster (i.e., the first peak of the pseudo cluster is the  $(p+1)$ -st peak of the isotopic distribution). First, we select  $I'_{-1}$  which is the intensity of a (noise) peak at the position of the  $p$ -th peak of the isotopic distribution.  $I'_{-1}$  is expected to be larger than  $I'_0/R_{max}(p-1, m)$  because  $R_{max}(p-1, m)$  represents the upper bound of  $I_p/I_{p-1}$  which corresponds to  $I'_0/I'_{-1}$ . Therefore, if  $I'_{-1}$  is smaller than  $I'_0/R_{max}(p-1, m)$ , the program calculate  $scoreR(-1, p, m)$  and add it to the score of the cluster ( $scoreR(-1, p, m)$  is always negative). Second, we select  $I'_n$  which is the intensity of a (noise) peak at the position of the  $(n+p+1)$ -st peak of the isotopic

distribution. The program calculates  $scoreR(n-1, p, m)$  and add it to the score of the cluster if  $I'_n$  is smaller than  $I'_{n-1} * R_{min}(n+p-1, m)$ .

If a peptide mass is greater than 4000 Da, we give more weight to the ratio and ratio product terms computed from high intensity peaks on the ground that high intensity peaks are more reliable than low intensity peaks. Note that a pseudo cluster contains few peaks in the case of  $m < 4000$ , so the use of weight may cause loss of information. Specifically, for each ratio and ratio product term, we use the smallest intensity in each ratio and ratio product term as its weight. In addition, the total score is normalized by  $I_{max}$ , which is the intensity of the highest peak in the cluster. Hence, the weighted score function is as follows.

$$\frac{1}{I_{max}} \left( \sum_{k=0}^{n-2} \min(I'_k, I'_{k+1}) scoreR(k, p, m) + \sum_{k=0}^{n-3} \min(I'_k, I'_{k+1}, I'_{k+2}) scoreRP(k, p, m) \right)$$

Another technique for  $m \geq 4000$  is an introduction of so called “*bias*”. Intuitively speaking, the bias is a trend in the ratio values that indicates whether a majority of them is larger than or smaller than the average values  $R_{avg}$ . The bias is defined as follows.

$$bias_{-1} = 0$$

$$bias_k = \begin{cases} bias_{k-1} + \frac{I'_{k+1}/I'_k - R_{avg}(k+p, m)}{R_{max}(k+p, m) - R_{avg}(k+p, m)} & \text{if } I'_{k+1}/I'_k > R_{avg}(k+p, m) \\ bias_{k-1} - \frac{R_{avg}(k+p, m) - I'_{k+1}/I'_k}{R_{avg}(k+p, m) - R_{min}(k+p, m)} & \text{otherwise} \end{cases}$$

The value  $bias_k$  represents an accumulation of biases of  $I'_1/I'_0$  to  $I'_{k+1}/I'_k$ . A large bias value means that there are many ratios which are larger than  $R_{avg}(k+p, m)$ . When the mass of a pseudo cluster is determined to be 1 Da larger than the correct mass, in general each ratio  $I'_{k+1}/I'_k$  is smaller than  $R_{avg}(k+p, m)$  because  $I_{k+1}/I_k \geq I_{k+2}/I_{k+1}$ . On the contrary, most of ratios are larger than average when the mass of a cluster is determined to be 1 Da smaller than the correct mass. Therefore the absolute values of biases get large when a monoisotopic mass is determined incorrectly. And if the bias values are close to 0, this means that the shape of this cluster is similar to that of the isotopic distribution. The weighted score function with the bias included for  $m \geq 4000$  is like the following:

$$\frac{1}{I_{\max}} \left( \sum_{k=0}^{n-2} \min(I'_k, I'_{k+1}) (1 - bias_k) scoreR(k, p, m) + \sum_{k=0}^{n-3} \min(I'_k, I'_{k+1}, I'_{k+2}) (1 - bias_k) scoreRP(k, p, m) \right)$$

**Figure S-1. Ten different scans of a peptide summarized in Table 4 ( $C_{101}H_{165}N_{29}O_{32}$ , 2296.22 Da).** An arrow represents the monoisotopic peak of this peptide and circles, diamonds and stars represent the theoretical isotopic distributions of this peptide calculated by each of our method, Decon2LS and ICR2LS, respectively.

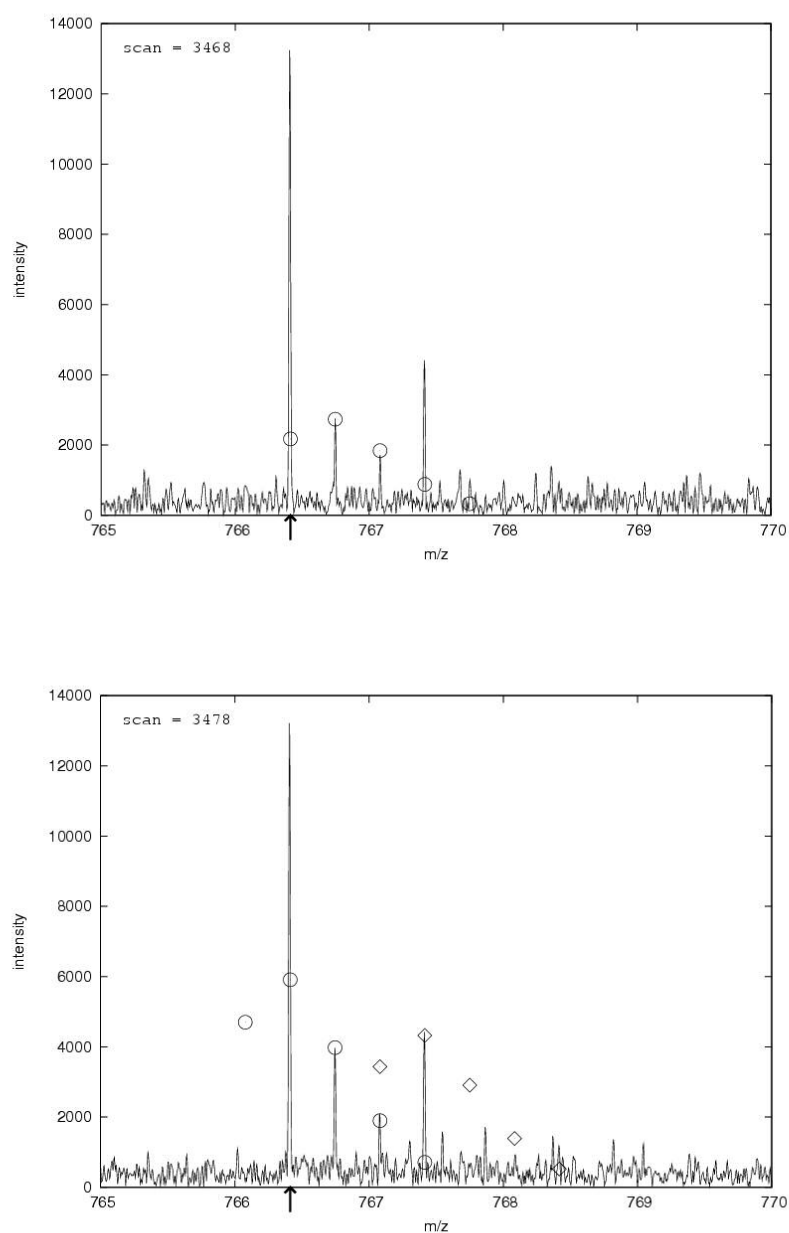

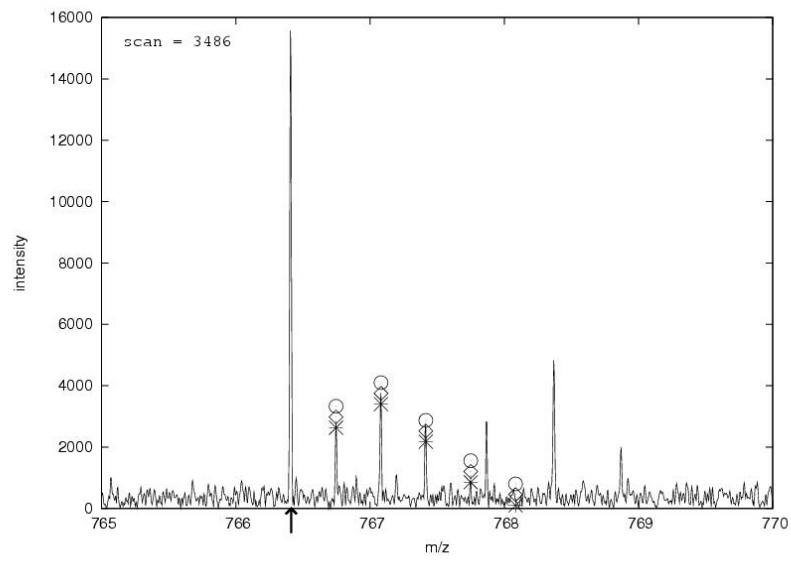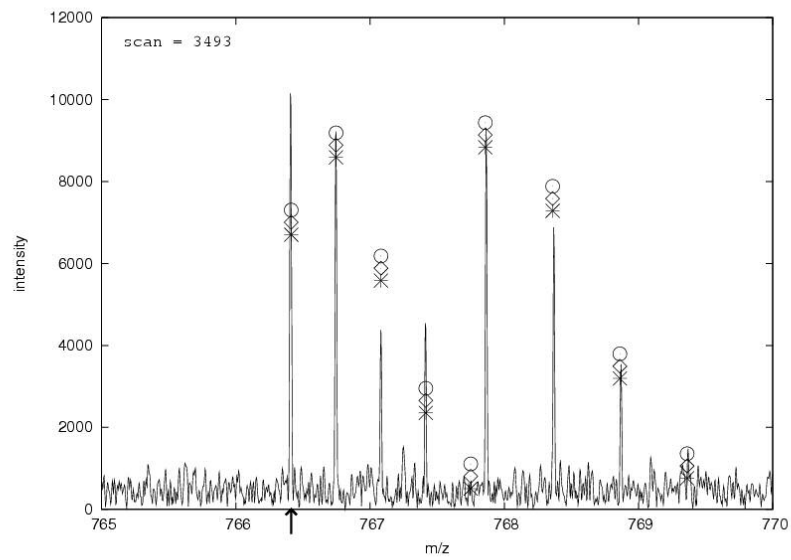



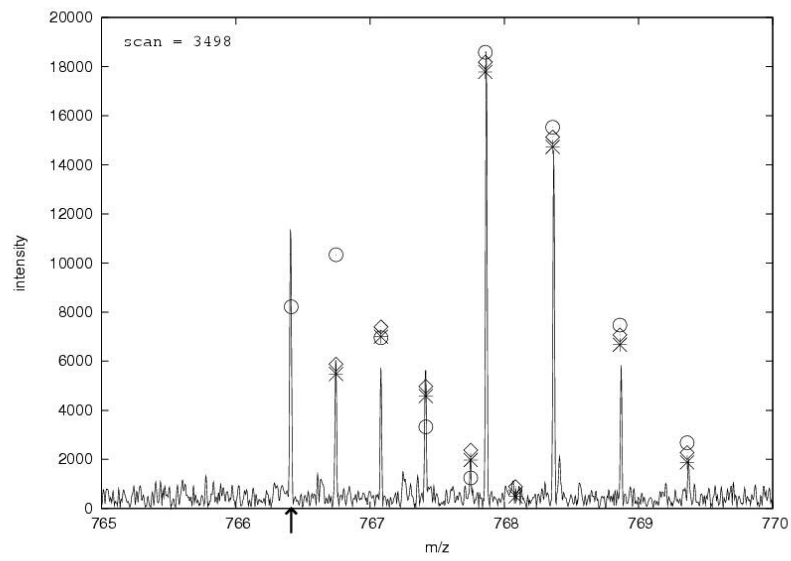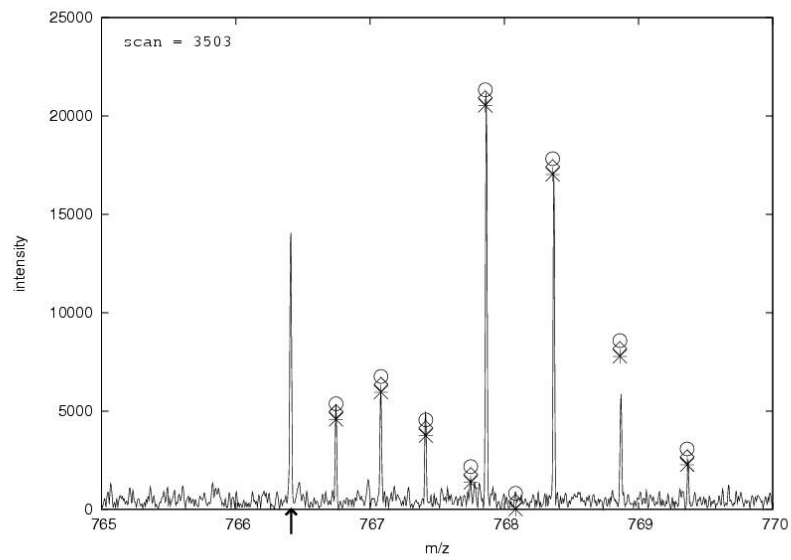

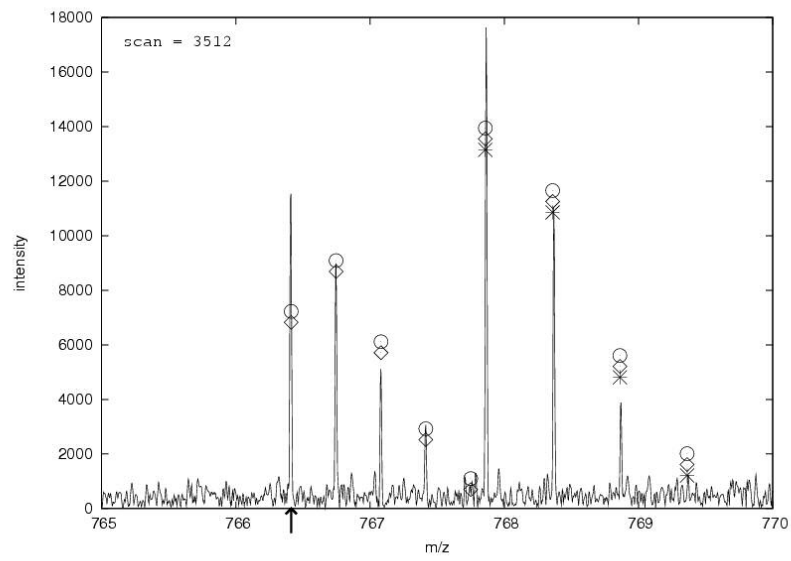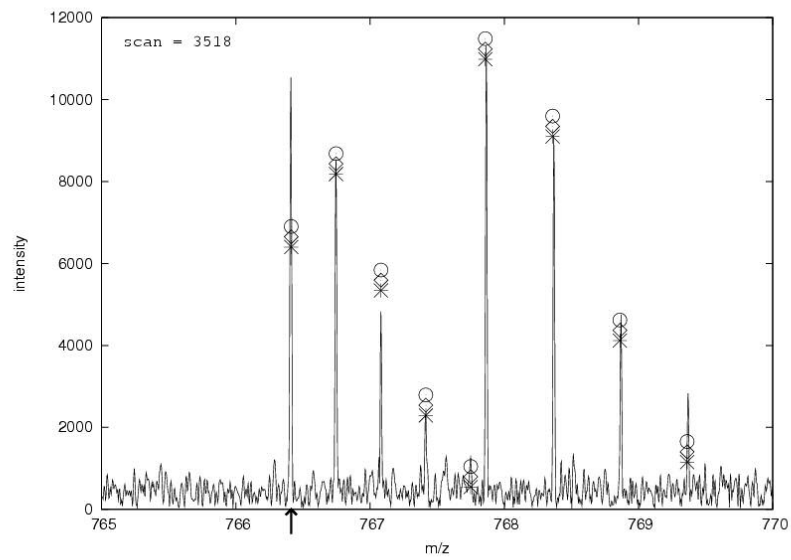

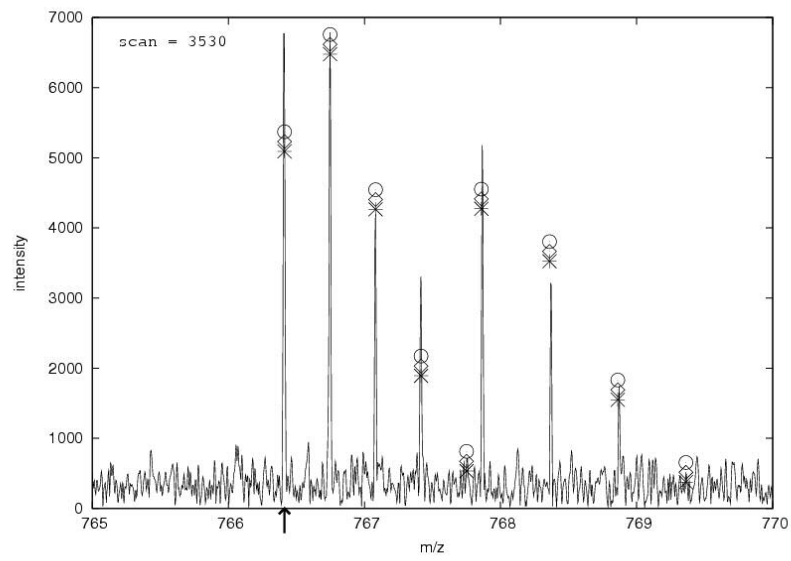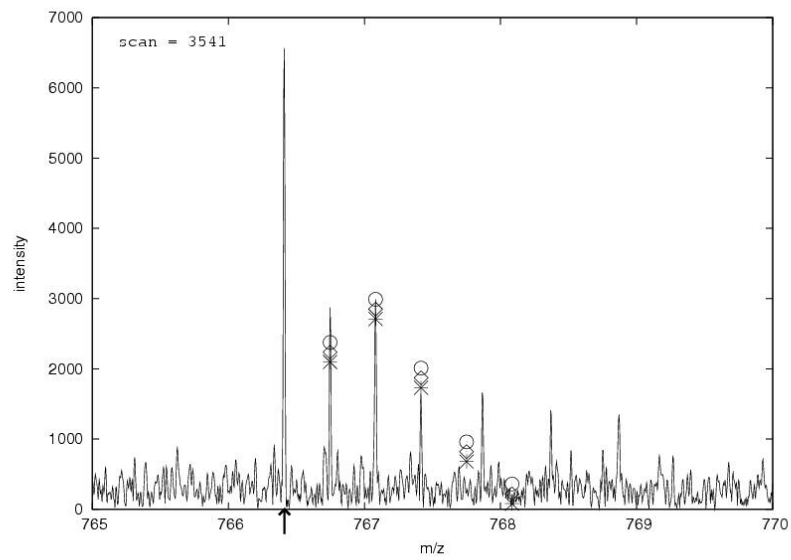

**Table S-1.** Computations of average  $I_{k+1} / I_k$  by the *averagine* model and by our fitting.

|             | Averagine                                     | Our fitting result                                                             |                                                |
|-------------|-----------------------------------------------|--------------------------------------------------------------------------------|------------------------------------------------|
|             |                                               | $m < 1800$                                                                     | $m \geq 1800$                                  |
| $I_1 / I_0$ | $5.43 \times 10^{-4} m$                       | $5.42 \times 10^{-4} m + 1.00 \times 10^{-30}$                                 | $5.44 \times 10^{-4} m + 1.00 \times 10^{-30}$ |
| $I_2 / I_1$ | $2.71 \times 10^{-4} m + 8.17 \times 10^{-2}$ | $2.79 \times 10^{-4} m + 5.94 \times 10^{-2}$                                  | $2.74 \times 10^{-4} m + 6.75 \times 10^{-2}$  |
| $I_3 / I_2$ | $1.81 \times 10^{-4} m + 1.63 \times 10^{-1}$ | $\frac{1.93 \times 10^{-4} m^2 + 1.28 \times 10^{-1} m}{m + 3.01 \times 10^2}$ | $1.86 \times 10^{-4} m + 7.41 \times 10^{-2}$  |

**Table S-2.** Computations of average  $I_k I_{k+2} / I_{k+1}^2$  by the *averagine* model and by our fitting.

|                   | Averagine                                                             | Our fitting result                                                        |                                                                       |
|-------------------|-----------------------------------------------------------------------|---------------------------------------------------------------------------|-----------------------------------------------------------------------|
|                   |                                                                       | $m < 1800$                                                                | $m \geq 1800$                                                         |
| $I_0 I_2 / I_1^2$ | $5.00 \times 10^{-1} + \frac{1.51 \times 10^2}{m}$                    | $5.12 \times 10^{-1} + \frac{1.14 \times 10^2}{m}$                        | $5.03 \times 10^{-1} + \frac{1.29 \times 10^2}{m}$                    |
| $I_1 I_3 / I_2^2$ | $6.67 \times 10^{-1} + \frac{2.01 \times 10^2}{m + 6.02 \times 10^2}$ | $7.30 \times 10^{-1} + \frac{-4.51 \times 10^{-1}}{m - 3.95 \times 10^2}$ | $6.66 \times 10^{-1} + \frac{2.31 \times 10^2}{m + 2.06 \times 10^3}$ |
| $I_2 I_4 / I_3^2$ | $7.50 \times 10^{-1} + \frac{2.64 \times 10^2}{m + 1.81 \times 10^3}$ | $7.56 \times 10^{-1} + \frac{1.50 \times 10^2}{m + 1.81 \times 10^3}$     | $7.59 \times 10^{-1} + \frac{1.51 \times 10^2}{m + 1.81 \times 10^3}$ |

**Table S-3. Average number of peaks and execution time of three programs. It**

shows that the number of peaks is a major factor in execution time.

| Segment <sup>1</sup> | Number<br>of scans | Average number of peaks |          |        | Time (s)      |          |        |
|----------------------|--------------------|-------------------------|----------|--------|---------------|----------|--------|
|                      |                    | Our<br>method           | Decon2LS | ICR2LS | Our<br>method | Decon2LS | ICR2LS |
| 1                    | 737                | 123                     | 123      | 135    | 625           | 757      | 4877   |
| 2                    | 921                | 164                     | 164      | 178    | 760           | 1027     | 7391   |
| 3                    | 1085               | 231                     | 231      | 260    | 861           | 1650     | 12269  |
| 4                    | 1205               | 586                     | 586      | 683    | 993           | 4834     | 43993  |
| 5                    | 1048               | 360                     | 360      | 413    | 816           | 2759     | 21531  |

<sup>1</sup> A total of five segment LC/MS/MS data set was obtained from a whole LC gradient experiment (see experimental section for details).

### Supplementary References

- (1) Snider, R. K. *J. Am. Soc. Mass Spectrom.* **2007**, 18, 1511-1515.
- (2) Yergey, J. A. *Int. J. Mass Spectrom. Ion Phys.* **1983**, 52, 337-349.
- (3) Rockwood, A. L.; Van Orden, S. L.; Smith, R. D. *Anal. Chem.* **1995**, 67, 2699-2704.
